# Supplementary material for: Genomic characterisation of recurrent Mycobacterium avium isolates from chronically infected patients reveals patterns of within-host evolution
Source: Research Square preprint supplement (doi:10.21203/rs.3.rs-5821601/v1), 2025-05-15
Supplement: Supplementary file 1 [file b92525985536452fdd7a96f6.docx]

**Table S2. Clinical and demographic characteristics of the Irish MAC patient cohort.**

| **Female** | 14 (70%) |
| --- | --- |
| **Age at first culture (years)** | median 65; range 30-83 |
| **Duration of sampling (years)** | median 2.3; range 0.14-9.55 |
| **Current or ex-smoker** | 11 (55%) |
| **BMI category at first culture** |  |
| Reduced | 4 (20%) |
| Normal | 9 (45%) |
| Increased | 5 (25%) |
| Unknown | 2 (10%) |
| **Underlying disease** |  |
| Bronchiectasis | 14 (70%) |
| HIV | 4 (20%) |
| **Recommended treatment for MAC** | 15 (75%) |
